# Supplementary material for: Interplay of auxin, KANADI and Class III HD-ZIP transcription factors in vascular tissue formation
Source: Oxford University Press journal article supplement (doi:10.1242/dev.047662), 2010-02-23
Supplement: dev047662tables1.pdf [file dev047662tables1.pdf]

**Table S1. Plant genotypes used for this study**

| Plant genotype                     | Description/reference                                                                                                                                                                  |
|------------------------------------|----------------------------------------------------------------------------------------------------------------------------------------------------------------------------------------|
| <i>pATHB15::LhG4</i>               | Five thousand bp of the 5' upstream sequence of <i>ATHB15</i> were amplified by PCR and cloned in front of the <i>LhG4</i> sequence                                                    |
| <i>10Op::ATHB8δmiR</i>             | A non-silent single-point mutation (G to D) was introduced in the <i>miR165/166</i> complementary site of an <i>ATHB8</i> cDNA and the cDNA was cloned behind the <i>10Op</i> sequence |
| <i>pLTP1::LhG4</i>                 | Moore et al., 2006                                                                                                                                                                     |
| <i>pREV::LhG4</i>                  | Moore et al., 2006                                                                                                                                                                     |
| <i>6Op::KAN1</i>                   | Eshed et al., 2001                                                                                                                                                                     |
| <i>10Op::miR165</i>                | Alvarez et al., 2005                                                                                                                                                                   |
| <i>10Op::ATHB8δmiR</i>             | Alvarez et al., 2005                                                                                                                                                                   |
| <i>10Op::GFP</i>                   | Alvarez et al., 2005                                                                                                                                                                   |
| <i>APL::GUS</i>                    | Bonke et al., 2003                                                                                                                                                                     |
| <i>ATHB8::GUS</i>                  | Baima et al., 1995                                                                                                                                                                     |
| <i>PIN1::GFP</i>                   | Benkova et al., 2003                                                                                                                                                                   |
| <i>35S::PIN1</i>                   | Benkova et al., 2003                                                                                                                                                                   |
| <i>DR5rev::GFP</i>                 | Friml et al., 2003                                                                                                                                                                     |
| <i>35S::KAN1-GR</i>                | Hawker and Bowman, 2004                                                                                                                                                                |
| <i>rev-9</i>                       | Emery et al., 2003                                                                                                                                                                     |
| <i>rev-10d</i>                     | Emery et al., 2003                                                                                                                                                                     |
| <i>phb-6 phv-5 rev-9</i>           | Emery et al., 2003                                                                                                                                                                     |
| <i>kan1-2 kan2-1 kan3-1 kan4-3</i> | Izhaki and Bowman, 2007                                                                                                                                                                |

Plants homozygous for the transactivation driver lines *pATHB15::LhG4*, *pLTP1::LhG4* and *pREV::LhG4* were crossed to plants homozygous for the various reporter constructs *6Op::KAN1*, *10Op::miR165*, *10Op::ATHB8δmiR* and *10Op::GFP*. *pATHB15::LhG4* and *10Op::miR165* were crossed to *rev-9* mutants and segregating plants homozygous for *pATHB15::LhG4* and *rev-9* were crossed with segregating plants homozygous for *10Op::miR165* and *rev-9*. *APL::GUS* and *ATHB8::GUS* plants were crossed with the *pATHB15::LhG4* driver line and plants homozygous for *pATHB15::LhG4* and either *APL::GUS* or *ATHB8::GUS* were crossed with homozygous reporter lines. Similarly, *PIN1::GFP*, *35S::PIN1* and *DR5rev::GFP* were introduced into the *pATHB15::LhG4* and the *pOP::KAN1* lines. *35S::KAN1-GR* plants were crossed with *35S::PIN1* plants and F3 plants homozygous for both gene constructs were selected.

## References

- Bonke, M., Thitamadee, S., Mahonen, A. P., Hauser, M. T. and Helariutta, Y. (2003). APL regulates vascular tissue identity in Arabidopsis. *Nature* **426**, 181-186.
- Moore, I., Samalova, M. and Kurup, S. (2006). Transactivated and chemically inducible gene expression in plants. *Plant J.* **45**, 651-683.
