# Supplementary material for: Interplay of auxin, KANADI and Class III HD-ZIP transcription factors in vascular tissue formation
Source: Oxford University Press journal article supplement (doi:10.1242/dev.047662), 2010-02-23
Supplement: dev047662tables2.pdf [file dev047662tables2.pdf]

**Table S2. Primer sequences for quantitative and semi-quantitative PCR and cloning of *ATHB15::LhG4* and *10OpTATA::ATHB8- $\delta$ miR***

| Primer              | Sequence (5' to 3') or source                                    |
|---------------------|------------------------------------------------------------------|
| S16                 | QT00833819 (Qiagen)                                              |
| KAN1                | QT00830802 (Qiagen)                                              |
| KAN2                | GCAGCTTCGTCAGGACAATC and<br>TCTCCGGAAGAATTGGTCCA                 |
| REV                 | CGAATAGTCTGTGCTGGATTG and<br>GATCTCTGCAATCTTCATAG                |
| PHB                 | QT00716583 (Qiagen)                                              |
| PHV                 | QT00870877 (Qiagen)                                              |
| AtHB15              | AGTCCTGCAGGACTTTTGTG and<br>CAATCTCTGCAACCCTTGTA                 |
| AtHB8               | AAGCAGAGGAAACTCAAG and<br>AAATGTGAATACCGGAGAT                    |
| PIN1                | QT00892654 (Qiagen)                                              |
| APL                 | QT00744926 (Qiagen)                                              |
| MP                  | QT00861847 (Qiagen)                                              |
| Cyclophilin         | TCTTCTCTTCGGAGCCATA and<br>AAGCTGGGAATGATTCGATG                  |
| AS2                 | ATGGCATCTTCTCAACAAAC and<br>TCAAGACGGATCAACAGTAC                 |
| PIN1                | ATGATTACGGCGGGACTTC and<br>TCATAGACCCAAGAGAAATGTAGTAGAG          |
| PIN3                | CAAGATGATCTCATGGCAGC and<br>GCTTATAACCCGAGTAGAATG                |
| KAN1-GR             | GGAGAAGAAGAAATGGGC and<br>CTTTGCCATTTCACTGC                      |
| PIN4                | GGAAAAAATGATTACGTGGC and<br>GGGACCAATTCAAAGGCC                   |
| AtHB15 promoter     | GGCGGCCATAGAGAGCAAATGTGATGGTG and<br>GGGGTACCTACTCTCAGCAAAACTCTT |
| ATHB8- $\delta$ miR | ACCTCGAGATGGGAGGAGGAAGCAATA and<br>CGGGTACCCATATAAAAAGACCAGTTGA  |

Either the QuantiTect Primer Assay (Qiagen) or oligonucleotide primers (Microsynth, Balgach, Sg, Switzerland) were used at a concentration of 0.5  $\mu$ M. Real-time quantitative RT-PCR was performed with an iCycler iQ Real-Time PCR Detection System (BioRad, Hercules, CA, USA), using Absolute SYBR Green Fluorescein, which binds non-specifically to double-stranded DNA (ABgene, Epsom, Surrey, UK). The ribosomal *S16* gene was used as a standard control. Reactions were performed in triplicate in 20  $\mu$ l using 100 ng cDNA and 0.4 mM MgCl<sub>2</sub> per reaction. Negative controls were performed in duplicate. Thermal cycling parameters were 95°C for 15 minutes, followed by 45 cycles at 95°C for 30 seconds, 59.7°C for 30 seconds and 72°C for 45 seconds. RT-PCR specificity was tested with melting-curve analysis and electrophoresis. Experiments were repeated three times. All calculations were performed with the Gene Expression Macro 1.1 (Bio-Rad) macros for Excel (Microsoft, Redmond, WA, USA). Semi-quantitative real-time PCR on 1  $\mu$ l cDNA was performed using ExTaq (TaKaRa Biotech).
